# Supplementary material
Source: publisher figshare collection journal article supplement (https://acs.figshare.com/ndownloader/files/4280152)
Supplement: Supplementary file 1 [file 4280152]

# Hydrogen H/D Exchange and Activation of C<sub>1–n</sub>-C<sub>4</sub> Alkanes on Ga-Modified Zeolite BEA Studied with <sup>1</sup>H MAS NMR In Situ

Anton A. Gabrienko,<sup>1</sup> Sergei S. Arzumanov,<sup>1</sup> Alexander V. Toktarev,<sup>1</sup> Dieter Freude<sup>2</sup>, Jürgen Haase<sup>2</sup>  
and Alexander G. Stepanov<sup>1\*</sup>

<sup>1</sup>Boriskov Institute of Catalysis, Siberian Branch of the Russian Academy of Sciences, Prospekt Akademika Lavrentieva 5, Novosibirsk 630090, Russia

<sup>2</sup>Universität Leipzig, Fakultät für Physik und Geowissenschaften, Linnéstraße 5, 04103 Leipzig, Germany

## Supporting Information

**TABLE 1S: Exchange Reactions Used for Simulating the Kinetics of the H/D Exchange for C<sub>2–n</sub>-C<sub>4</sub> alkanes on H-BEA and Ga/H-BEA Zeolites**

| no. | Exchange reaction                                                                                            | Rate expression                                                                                                           |
|-----|--------------------------------------------------------------------------------------------------------------|---------------------------------------------------------------------------------------------------------------------------|
| 1   | $\text{CD}_3\text{CD}_3 + \text{OH} \rightleftharpoons \text{CD}_2\text{HCD}_3 + \text{OD}$                  | $R_1 = k_a [\text{CD}_3\text{CD}_3][\text{OH}] - (1/6) k_a [\text{CD}_2\text{HCD}_3][\text{OD}]$                          |
| 2   | $\text{CD}_2\text{HCD}_3 + \text{OH} \rightleftharpoons \text{CDH}_2\text{CD}_3 + \text{OD}$                 | $R_2 = (1/3) k_a [\text{CD}_2\text{HCD}_3][\text{OH}] - (1/3) k_a [\text{CDH}_2\text{CD}_3][\text{OD}]$                   |
| 3   | $\text{CD}_2\text{HCD}_3 + \text{OH} \rightleftharpoons \text{CD}_2\text{HCD}_2\text{H} + \text{OD}$         | $R_3 = (1/2) k_a [\text{CD}_2\text{HCD}_3][\text{OH}] - (1/3) k_a [\text{CD}_2\text{HCD}_2\text{H}][\text{OD}]$           |
| 4   | $\text{CDH}_2\text{CD}_3 + \text{OH} \rightleftharpoons \text{CH}_3\text{CD}_3 + \text{OD}$                  | $R_4 = (1/6) k_a [\text{CDH}_2\text{CD}_3][\text{OH}] - (1/2) k_a [\text{CH}_3\text{CD}_3][\text{OD}]$                    |
| 5   | $\text{CDH}_2\text{CD}_3 + \text{OH} \rightleftharpoons \text{CDH}_2\text{CD}_2\text{H} + \text{OD}$         | $R_5 = (1/2) k_a [\text{CDH}_2\text{CD}_3][\text{OH}] - (1/6) k_a [\text{CDH}_2\text{CD}_2\text{H}][\text{OD}]$           |
| 6   | $\text{CH}_3\text{CD}_3 + \text{OH} \rightleftharpoons \text{CH}_3\text{CD}_2\text{H} + \text{OD}$           | $R_6 = (1/2) k_a [\text{CH}_3\text{CD}_3][\text{OH}] - (1/6) k_a [\text{CH}_3\text{CD}_2\text{H}][\text{OD}]$             |
| 7   | $\text{CH}_3\text{CD}_2\text{H} + \text{OH} \rightleftharpoons \text{CH}_3\text{CDH}_2 + \text{OD}$          | $R_7 = (1/3) k_a [\text{CH}_3\text{CD}_2\text{H}][\text{OH}] - (1/3) k_a [\text{CH}_3\text{CDH}_2][\text{OD}]$            |
| 8   | $\text{CH}_3\text{CDH}_2 + \text{OH} \rightleftharpoons \text{CH}_3\text{CH}_3 + \text{OD}$                  | $R_8 = (1/6) k_a [\text{CH}_3\text{CDH}_2][\text{OH}] - k_a [\text{CH}_3\text{CH}_3][\text{OD}]$                          |
| 9   | $\text{CD}_2\text{HCD}_2\text{H} + \text{OH} \rightleftharpoons \text{CDH}_2\text{CD}_2\text{H} + \text{OD}$ | $R_9 = (2/3) k_a [\text{CD}_2\text{HCD}_2\text{H}][\text{OH}] - (1/3) k_a [\text{CDH}_2\text{CD}_2\text{H}][\text{OD}]$   |
| 10  | $\text{CDH}_2\text{CD}_2\text{H} + \text{OH} \rightleftharpoons \text{CH}_3\text{CD}_2\text{H} + \text{OD}$  | $R_{10} = (1/6) k_a [\text{CDH}_2\text{CD}_2\text{H}][\text{OH}] - (1/2) k_a [\text{CH}_3\text{CD}_2\text{H}][\text{OD}]$ |
| 11  | $\text{CDH}_2\text{CD}_2\text{H} + \text{OH} \rightleftharpoons \text{CDH}_2\text{CDH}_2 + \text{OD}$        | $R_{11} = (1/3) k_a [\text{CDH}_2\text{CD}_2\text{H}][\text{OH}] - (2/3) k_a [\text{CDH}_2\text{CDH}_2][\text{OD}]$       |
| 12  | $\text{CDH}_2\text{CDH}_2 + \text{OH} \rightleftharpoons \text{CH}_3\text{CDH}_2 + \text{OD}$                | $R_{12} = (1/3) k_a [\text{CDH}_2\text{CDH}_2][\text{OH}] - (1/2) k_a [\text{CH}_3\text{CDH}_2][\text{OD}]$               |
| 13  | $-\text{CD}_2- + \text{OH} \rightleftharpoons -\text{CDH}- + \text{OD}$                                      | $R_{13} = k_b [\text{CD}_2][\text{OH}] - (1/2) k_b [\text{CDH}][\text{OD}]$                                               |

|    |                                                                                               |                                                                                                               |
|----|-----------------------------------------------------------------------------------------------|---------------------------------------------------------------------------------------------------------------|
| 14 | $-\text{CDH}- + \text{OH} \rightleftharpoons -\text{CH}_2- + \text{OD}$                       | $R_{14} = (1/2) k_b [\text{CDH}][\text{OH}] - k_b [\text{CH}_2][\text{OD}]$                                   |
| 15 | $-\text{CD}_2\text{CD}_2- + \text{OH} \rightleftharpoons -\text{CDHCD}_2- + \text{OD}$        | $R_{15} = k_c [\text{CD}_2\text{CD}_2][\text{OH}] -$<br>$-(1/4) k_c [\text{CDHCD}_2][\text{OD}]$              |
| 16 | $-\text{CDHCD}_2- + \text{OH} \rightleftharpoons -\text{CH}_2\text{CD}_2- + \text{OD}$        | $R_{16} = (1/4) k_c [\text{CDHCD}_2][\text{OH}] -$<br>$-(1/2) k_c [\text{CH}_2\text{CD}_2][\text{OD}]$        |
| 17 | $-\text{CDHCD}_2- + \text{OH} \rightleftharpoons -\text{CDHCDH}- + \text{OD}$                 | $R_{17} = (1/2) k_c [\text{CDHCD}_2][\text{OH}] -$<br>$-(1/2) k_c [\text{CDHCDH}][\text{OD}]$                 |
| 18 | $-\text{CH}_2\text{CD}_2- + \text{OH} \rightleftharpoons -\text{CH}_2\text{CDH}- + \text{OD}$ | $R_{18} = (1/2) k_c [\text{CH}_2\text{CD}_2][\text{OH}] -$<br>$-(1/4) k_c [\text{CH}_2\text{CDH}][\text{OD}]$ |
| 19 | $-\text{CH}_2\text{CDH}- + \text{OH} \rightleftharpoons -\text{CH}_2\text{CH}_2- + \text{OD}$ | $R_{19} = (1/4) k_c [\text{CH}_2\text{CDH}][\text{OH}] -$<br>$-k_c [\text{CH}_2\text{CH}_2][\text{OD}]$       |
| 20 | $-\text{CDHCDH}- + \text{OH} \rightleftharpoons -\text{CH}_2\text{CDH}- + \text{OD}$          | $R_{20} = (1/2) k_c [\text{CDHCDH}][\text{OH}] -$<br>$-(1/2) k_c [\text{CH}_2\text{CDH}][\text{OD}]$          |

For kinetics modeling the H/D exchange in alkanes the following reactions from Table 1S were taken into account:

- **ethane- $d_6$** : reactions 1-12 with OH represented by SiOHAl ( $k_a = k_{\text{SiOHAl}}$ ) and the same reactions 1-12 with OH represented by SiOH (i.e.  $k_a = k_{\text{SiOH}}$ );
- **propane- $d_8$** : reactions 1-12 to describe the exchange in the methyl groups ( $k_a = k_{\text{CH}_3}$ ) and reactions 13-14 to describe the exchange in the methylene groups ( $k_b = k_{\text{CH}_2}$ );
- ***n*-butane- $d_{10}$** : reactions 1-12 to describe the exchange in the methyl groups ( $k_a = k_{\text{CH}_3}$ ) and reactions 15-20 to describe the exchange in the methylene groups ( $k_c = k_{\text{CH}_2}$ );

### (1) H/D exchange in $\text{C}_1, \text{C}_2$ alkanes.

On the base of correspondent reactions from Table1 and Table 1S the following kinetic equations are derived for SiODAl and SiOD groups

$$\begin{aligned} \frac{d[\text{SiODAl}]}{dt} &= k_{\text{SiOHAl}} \left\{ [\text{CD}_n]_0 [\text{SiOHAl}]_0 - [\text{CD}_n]_0 [\text{SiODAl}] - \frac{1}{n} [\text{X}_{\text{CH}_n}] [\text{SiOHAl}]_0 \right\} \\ \frac{d[\text{SiOD}]}{dt} &= k_{\text{SiOH}} \left\{ [\text{CD}_n]_0 [\text{SiOH}]_0 - [\text{CD}_n]_0 [\text{SiOD}] - \frac{1}{n} [\text{X}_{\text{CH}_n}] [\text{SiOH}]_0 \right\} \end{aligned} \quad (1\text{S})$$

where  $[\text{CD}_n]_0$  is the initial concentrations of alkane;  $[\text{X}]_{\text{CH}_n}$  is the concentration of protium in alkane calculated as following

$$[\text{X}_{\text{CH}_n}] = \sum_{k=1}^n k [\text{CD}_{n-k} \text{H}_k]$$

The system of differential equations (1S) is easily transformed into system (2), assuming that  $[X_{\text{CHn}}] = [\text{SiODAl}] + [\text{SiOD}]$  and mole fractions of D isotope are determined via equalities

$$F_{\text{SiODAl}} = \frac{[\text{SiODAl}]}{[\text{SiOHAl}]_0}, \quad F_{\text{SiOD}} = \frac{[\text{SiOD}]}{[\text{SiOH}]_0}.$$

## (2) H/D exchange in C<sub>3</sub>, *n*-C<sub>4</sub> alkanes.

On the base of correspondent reactions from Table 1S the following kinetic equations are derived for concentration of protium in the methyl groups  $[\text{H}]_{\text{CH}_3}$  and the methylene groups  $[\text{H}]_{\text{CH}_2}$ :

$$\begin{aligned} \frac{d[X_{\text{H}}^a]}{dt} &= k_{\text{CH}_3} \left\{ [\text{RD}_a^{(\text{CH}_3)}]_0 [\text{OH}]_0 - [\text{RD}_a^{(\text{CH}_3)}]_0 [\text{OD}] - \frac{1}{a} [X_{\text{H}}^a] [\text{OH}]_0 \right\} \\ \frac{d[X_{\text{H}}^b]}{dt} &= k_{\text{CH}_2} \left\{ [\text{RD}_b^{(\text{CH}_2)}]_0 [\text{OH}]_0 - [\text{RD}_b^{(\text{CH}_2)}]_0 [\text{OD}] - \frac{1}{b} [X_{\text{H}}^b] [\text{OH}]_0 \right\} \end{aligned} \quad (2\text{S})$$

where  $[\text{RD}_a^{(\text{CH}_3)}]_0$  and  $[\text{RD}_b^{(\text{CH}_2)}]_0$  represent the initial concentrations of the methyl and the methylene groups (in  $\mu\text{mol g}^{-1}$ ), respectively;  $a$  and  $b$  is the total number of hydrogen atoms in methyl groups and methylene groups of a hydrocarbon, respectively;  $[\text{OH}]_0 = [\text{SiOHAl}]_0 + [\text{SiOH}]_0$  is the total initial concentration of zeolitic OH groups.

Protium concentrations  $[\text{H}]_{\text{CH}_3}$ ,  $[\text{H}]_{\text{CH}_2}$  correspond to

$$[\text{H}]_{\text{CH}_3} = \sum_{k=1}^a k [\text{RD}_{a-k} \text{H}_k], \quad [\text{H}]_{\text{CH}_2} = \sum_{l=1}^b l [\text{RD}_{b-l} \text{H}_l]$$

The system of differential equations (2S) is easily transformed into system (6), assuming that  $[\text{OD}] = [\text{H}]_{\text{CH}_3} + [\text{H}]_{\text{CH}_2}$  and mole fractions of H isotope are determined via equalities

$$F_{\text{H}}^a = \frac{[\text{H}]_{\text{CH}_3}}{a [\text{RD}_a^{(\text{CH}_3)}]_0}, \quad F_{\text{H}}^b = \frac{[\text{H}]_{\text{CH}_2}}{b [\text{RD}_b^{(\text{CH}_2)}]_0}.$$

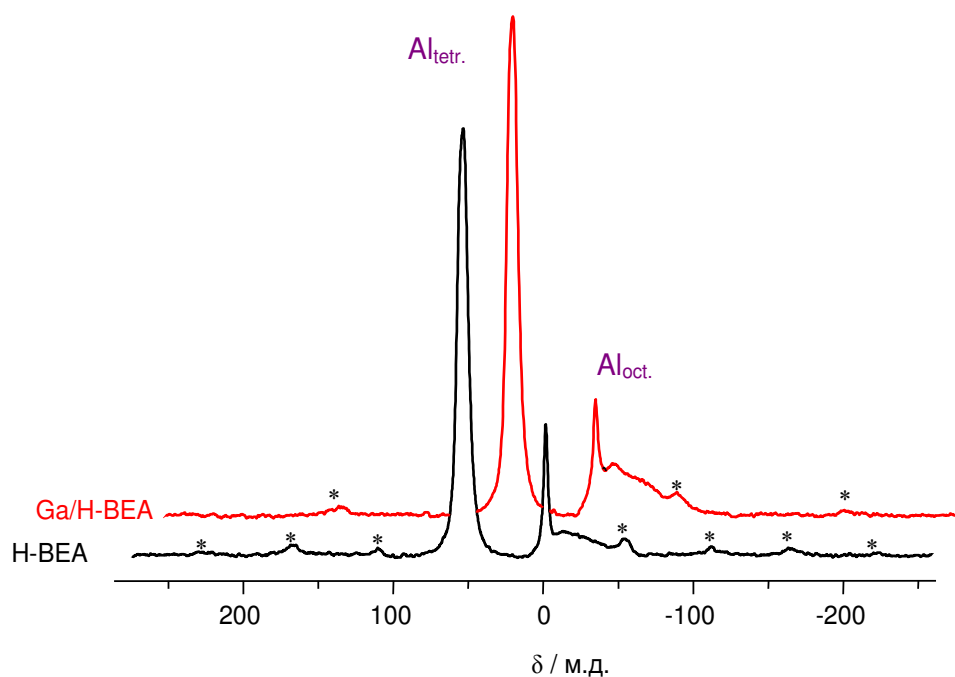

**Figure 1S.**  $^{27}\text{Al}$  MAS NMR spectra of zeolites H-BEA and Ga/H-BEA. Asterisks \* belong to spinning sidebands.

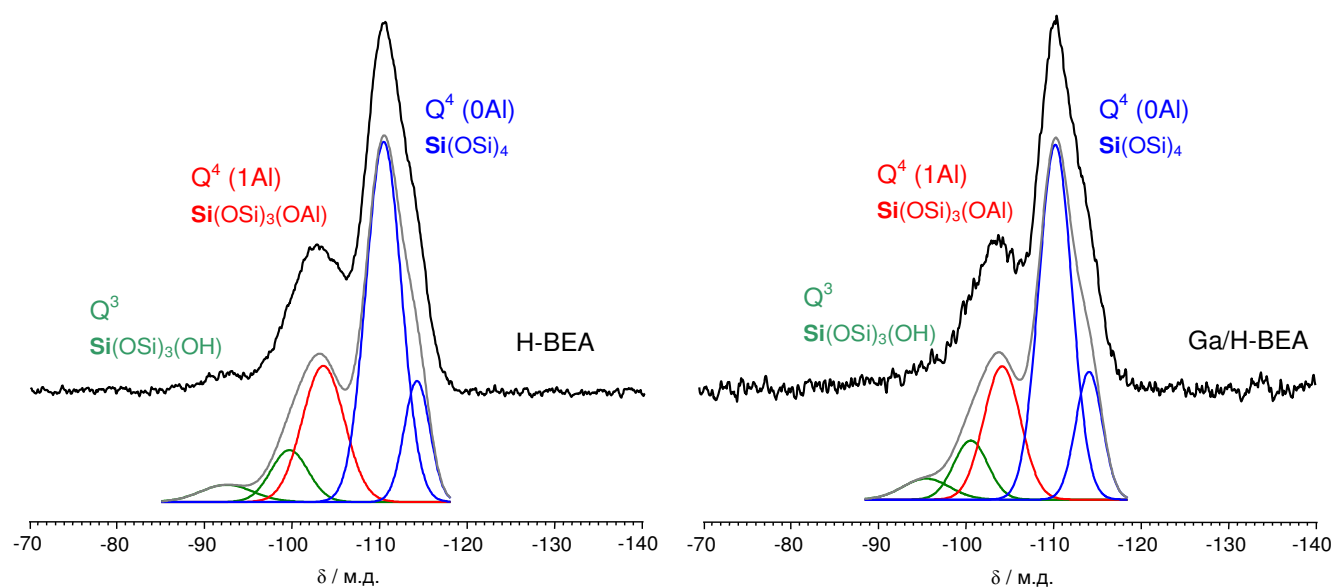

**Figure 2S.**  $^{29}\text{Si}$  MAS NMR spectra of zeolites H-BEA and Ga/H-BEA.

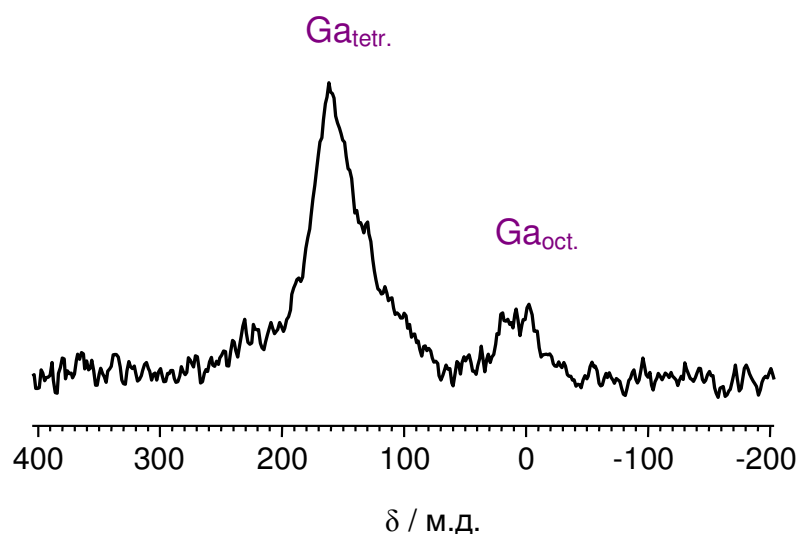

**Figure 3S.**  $^{71}\text{Ga}$  MAS NMR spectrum of zeolite Ga/H-BEA .
